# Supplementary material
Source: PubMed Central journal article supplement (PMC1744537)
Supplement: straninf_78_5_342__1.pdf [file straninf_78_5_342__1.pdf]

# Sexual Health for Young People Questionnaire

We are planning a new confidential sexual health service for people under 18 years. We need your help to make sure we provide something young people would want to use. Your answers will be used to design a service for you and people like you. Imagine you are going to visit the clinic today. We want you to tell us how you feel, and how we can make it easier for you. This questionnaire is anonymous. No one will be able to trace your answers back to you.

## First a little about you

Are you male or female? Male<sup>(1)</sup>  Female<sup>(2)</sup>   
How old are you? .....

## The basics

We need you help to decide what the clinic should be like, where it should be, and when it should be open.

### **What services from the list below do you think someone like you might use? (Tick as many as you like)**

- |                                                                        |                          |                                                        |                          |
|------------------------------------------------------------------------|--------------------------|--------------------------------------------------------|--------------------------|
| Advice before having sex for the first time <sup>(1)</sup>             | <input type="checkbox"/> | To 'go on the pill' <sup>(7)</sup>                     | <input type="checkbox"/> |
| Advice about HIV/AIDS <sup>(2)</sup>                                   | <input type="checkbox"/> | Free condoms <sup>(8)</sup>                            | <input type="checkbox"/> |
| Advice about using condoms <sup>(3)</sup>                              | <input type="checkbox"/> | Morning after (Emergency) contraception <sup>(9)</sup> | <input type="checkbox"/> |
| Relationship advice <sup>(4)</sup>                                     | <input type="checkbox"/> | General advice about contraception <sup>(10)</sup>     | <input type="checkbox"/> |
| Help with other worries to do with sex and sexuality <sup>(5)</sup>    | <input type="checkbox"/> | None <sup>(11)</sup>                                   | <input type="checkbox"/> |
| Worries that you may have an infection or other problem <sup>(6)</sup> | <input type="checkbox"/> | Other (specify) <sup>(12)</sup> .....                  |                          |
|                                                                        |                          | .....                                                  |                          |
|                                                                        |                          | .....                                                  |                          |
|                                                                        |                          | .....                                                  |                          |

### **We want the clinic to be for people 18 years and under. At what age do YOU think the service should begin?**

.....

### **Where should the clinic be? Tick all statements you agree with.**

- |                                                                   |                          |                                                               |                          |
|-------------------------------------------------------------------|--------------------------|---------------------------------------------------------------|--------------------------|
| It should be within a main hospital <sup>(1)</sup>                | <input type="checkbox"/> | It must be near the bus or tube <sup>(5)</sup>                | <input type="checkbox"/> |
| It should be in a clinic away from a main hospital <sup>(2)</sup> | <input type="checkbox"/> | I'd prefer the entrance to be on a main road <sup>(6)</sup>   | <input type="checkbox"/> |
| It should be attached to my own family doctor <sup>(3)</sup>      | <input type="checkbox"/> | I'd prefer the entrance to be in a side street <sup>(7)</sup> | <input type="checkbox"/> |
| It should be near my school/college <sup>(4)</sup>                | <input type="checkbox"/> | Other (please specify) <sup>(8)</sup> .....                   |                          |
|                                                                   |                          | .....                                                         |                          |

### **When is the easiest time to visit the clinic? Tick the most suitable times.**

- |                                             |                          |                             |                          |
|---------------------------------------------|--------------------------|-----------------------------|--------------------------|
| In the morning before school <sup>(1)</sup> | <input type="checkbox"/> | After school <sup>(3)</sup> | <input type="checkbox"/> |
| Lunchtime <sup>(2)</sup>                    | <input type="checkbox"/> | Saturday <sup>(4)</sup>     | <input type="checkbox"/> |

**Most young people's clinics run once a week. What do you think? Tick only one box.**

Once a week seems OK <sup>(1)</sup>  It's very important it's open more often <sup>(2)</sup>

Getting There

This section asks you questions to help us decide how to tell people about the clinic, and how to make it as easy as possible for you to get to see someone.

**What do you think would be the best way for us to tell you about the clinic?**

**Tick only one box**

Visit to the clinic during PSE classes <sup>(1)</sup>  Poster in your GP surgery <sup>(4)</sup>   
Poster at school <sup>(2)</sup>  School nurse <sup>(5)</sup>   
Leaflets at school <sup>(3)</sup>  Other <sup>(6)</sup>

**Would you be most likely to attend the clinic..... (choose one)**

On your own <sup>(1)</sup>  With your parents <sup>(3)</sup>   
With a friend or partner <sup>(2)</sup>  With another relative <sup>(4)</sup>

**How would you like to get to see someone?**

**Tick only one box**

Telephone to make an appointment for later <sup>(1)</sup>   
Walk in to make an appointment for later <sup>(2)</sup>   
Walk in and be seen without having to make an appointment <sup>(3)</sup>

**When you walk in the door, how would you like to let us know why you've attended?**

**Tick only one box**

Be able to ask for someone by name <sup>(1)</sup>   
Show a special card or leaflet available from school/youth clubs etc <sup>(2)</sup>   
Explain to the receptionist you have come to the young people's clinic <sup>(3)</sup>

**We need you to fill in a form and give you a number before we can do tests or give treatments.**

**When do you think we should do this?**

**Tick only one box**

With a receptionist when you walk in the door <sup>(1)</sup>   
After I've been able to explain to someone in private the reason I've come to the clinic <sup>(2)</sup>   
Everyone should be registered in advance at school <sup>(3)</sup>

Waiting to see someone

You're now in the waiting area in the clinic. We are now going to ask some questions to help us make it as comfortable as possible.

**Who would you rather was in the waiting area?**

**Tick only one box**

Only young people <sup>(1)</sup>  I don't mind <sup>(3)</sup>   
A mixture of ages <sup>(2)</sup>  No answer

**How would you like the staff to call you from the waiting area? Tick only one box**

By your first name e.g. Paul <sup>(1)</sup>   
By your surname e.g. Mr Smith <sup>(2)</sup>

By your full name e.g. Paul Smith <sup>(3)</sup>   
By taking a numbered ticket and  
be called by that number <sup>(4)</sup>

**What is the longest time you would wait to see someone?**

5 mins <sup>(1)</sup>  10 mins <sup>(3)</sup>   
20 mins <sup>(2)</sup>  25 mins <sup>(4)</sup>

**Tick only one box**

15 mins <sup>(5)</sup>   
30 mins <sup>(6)</sup>

People who work in the clinic

Now some questions about the staff you'd see.

**What would you like to call the doctor/nurse you see?**

By their first name e.g. Sarah <sup>(1)</sup>   
By their surname e.g. Dr Jones <sup>(2)</sup>

**Tick only one box**

By their job e.g. Doctor <sup>(3)</sup>   
Depends on the person <sup>(4)</sup>

**What would you like the staff to wear?**

Hospital uniforms <sup>(1)</sup>   
Casual uniforms e.g. sweatshirts <sup>(2)</sup>

**Tick only one box**

No uniform, just a name badge <sup>(3)</sup>   
No answer

**We try to give people a choice of the sex of their doctor/ nurse. What do you think?**

I would like to be seen by a female doctor/nurse <sup>(1)</sup>   
I would like to be seen by a male doctor/nurse <sup>(2)</sup>

**Tick only one box**

It's not important <sup>(3)</sup>   
No answer

**What is the most important thing about the staff you see?**

They are friendly <sup>(1)</sup>   
They don't judge me <sup>(2)</sup>   
Their sex <sup>(3)</sup>   
Their age <sup>(4)</sup>   
The clothes they are wearing <sup>(5)</sup>   
They take time to explain things <sup>(6)</sup>

**Tick as many as you like**

They give me what I have attended for <sup>(7)</sup>   
They let me stay in control of what happens <sup>(8)</sup>   
I know that everything I say is confidential <sup>(9)</sup>   
They don't speak to me outside the clinic <sup>(10)</sup>   
I can see the same person on different visits <sup>(11)</sup>

Getting information

This section asks you about how you find out about things to do with your sexual health.

**If you needed information about sexual health today, where would you get it from?**

.....

Finally

The most important thing that would stop me using a Sexual Health Clinic is

.....  
.....  
.....

Do you have any comments?

.....  
.....  
.....  
.....  
.....  
.....

Thank you. Your answers will help us develop special sexual health services for young people.



In the meantime, you can use our free confidential service.  
The Victoria Sexual Health Clinic, 6 Osbert Street, off Vauxhall Bridge Road.  
Tel: (0181) 746 8066.

Around September/October time, we will be moving to the 2<sup>nd</sup> Floor, South Westminster Centre, St George's House at 82 Vincent Square (which is just around the corner).  
Tel: (0181) 746 8066
